# Supplementary material
Source: publisher figshare collection journal article supplement (https://springernature.figshare.com/articles/dataset/_/26028958)
Supplement: Supplementary file 1 [file 1]

## Sheet: Sheet1
Year	Tair (°C)	std	CFE (indica, %)	std	CFE (japonica, %)	std			Latitude	CFE	std	CFE	std	CFE	std	CFE	std	CFE	std	CFE	std	CFE	std	CFE	std	CFE	std	CFE	std	CFE	std	CFE	std	CFE	std	CFE	std	Tair	std	Tair	std	Tair	std	Tair	std	Tair	std	Tair	std
										%		%		%		%		%		%		%		%		%		%		%		%		%		%		℃		℃		℃		℃		℃		℃
										indica		indica		indica		indica		indica		indica		indica		japonica		japonica		japonica		japonica		japonica		japonica		japonica
										2031-2040		2041-2050		2051-2060		2061-2070		2071-2080		2081-2090		2091-2099		2031-2040		2041-2050		2051-2060		2061-2070		2071-2080		2081-2090		2091-2099		2031-2040		2041-2050		2051-2060		2061-2070		2071-2080		2081-2090
2035	25.3225	0.77165	6.07436	2.33269	2.75883	1.32941			-37.5	-0.36787	0	1.70838	0	6.71928	0	13.4474	0	21.6218	0	28.417	0	28.5572	0	1.29858	0	0.28759	0	3.60193	0	8.72818	0	11.9358	0	18.7661	0	21.1941	0	16.9195	0	17.2689	0	17.7411	0	18.1762	0	18.7205	0	19.1318	0
2045	25.5708	0.82684	8.88053	2.61796	3.83529	3.46305			-36.5	7.68207	6.2296	13.4467	8.91403	21.3494	10.9604	30.8304	12.5756	40.0297	13.0352	47.1886	13.0623	46.7891	12.721	4.71359	2.54205	6.8343	4.79054	11.6661	5.79049	18.3131	6.60146	21.2089	6.06831	28.4639	6.23533	29.9642	5.45773	18.9068	1.68477	19.2876	1.69158	19.7569	1.68366	20.2638	1.71588	20.8389	1.73665	21.238	1.72561
2055	26.0082	0.8528	11.0745	4.52632	4.39952	2.87819			-35.5	14.0586	5.07245	22.3921	7.1322	32.2061	8.6321	42.8602	9.62647	51.7968	9.46822	58.4229	9.08063	56.4877	8.06377	7.06196	1.81117	11.1784	3.37459	16.748	3.92864	23.796	4.27055	25.3867	3.28817	32.3953	3.18594	32.1373	2.29846	20.982	1.75229	21.3719	1.76045	21.8539	1.7722	22.3928	1.81525	22.9845	1.83938	23.3987	1.85772
2065	26.4784	0.77544	12.1474	5.78954	4.05204	3.72458			-34.5	16.6288	5.38846	25.6336	7.31003	35.7171	8.50521	46.1757	8.86078	54.0262	8.0404	59.6296	7.12957	56.102	5.62009	7.55525	1.67107	11.9756	3.00599	17.3209	3.24267	23.9754	3.14617	24.2084	2.01993	30.6486	2.08353	28.8866	3.23486	22.4551	2.21885	22.7848	2.19683	23.2451	2.18982	23.7719	2.19852	24.2818	2.19562	24.6736	2.20375
2075	26.8559	0.79922	12.1562	7.07901	1.61935	4.78061			-33.5	18.1634	4.00757	27.6007	5.3017	37.8108	6.01039	48.1541	6.07989	55.5908	5.3946	60.8036	4.86281	56.7983	4.61921	7.80063	1.13323	12.3866	2.02463	17.637	2.24962	24.1489	2.41088	23.818	2.95377	30.0954	3.57034	27.8716	5.32458	23.4036	2.01948	23.7039	1.9944	24.0918	1.95926	24.5554	1.93662	24.9948	1.91444	25.3629	1.90127
2085	27.3164	0.80509	9.89948	8.87244	0.34406	5.68421			-32.5	19.7128	0.44052	29.549	0.41406	39.865	0.53034	49.9348	1.22162	56.5788	2.56705	60.8261	4.08782	55.4512	6.17751	7.97557	0.58885	12.6421	1.21555	17.6243	1.94951	23.7494	2.78429	22.2802	4.56551	27.891	5.5271	24.3013	7.53158	24.4637	1.12684	24.7425	1.148	25.1375	1.14383	25.5911	1.15339	26.029	1.20481	26.4308	1.1958
2095	27.6406	0.80901	7.48081	10.3411	-2.21072	6.61815			-31.5	19.6941	0.36502	29.3254	0.95073	39.2693	1.90965	48.7918	3.27786	54.6066	5.39082	57.802	7.60073	51.2319	10.3875	7.55632	1.12422	11.7832	2.30195	16.2893	3.48092	21.8756	4.76855	19.4362	7.2596	24.2805	8.67297	19.5686	11.2807	25.0368	1.36064	25.3256	1.38567	25.726	1.38481	26.1937	1.38925	26.6389	1.44978	27.0762	1.44151
									-30.5	19.5757	0.6223	28.9452	1.41795	38.4601	2.57857	47.3441	4.21125	52.3218	6.60568	54.3693	9.32889	46.4892	12.485	7.09714	1.34204	10.8175	2.75299	14.8237	4.12856	19.8064	5.65015	16.4006	8.41442	20.4518	10.2641	14.5021	13.1886	25.5819	1.46152	25.8982	1.48443	26.2935	1.49484	26.7759	1.50884	27.2282	1.56522	27.6792	1.59174
									-29.5	19.2296	0.85244	28.2754	1.91381	37.4156	3.37784	45.8066	5.42265	50.1779	8.29004	51.357	11.8241	42.4734	15.7923	6.69985	1.67649	9.95556	3.46745	13.5847	5.16334	18.1318	7.04489	14.0814	10.3149	17.5048	12.7758	10.6218	16.4196	25.8482	1.75427	26.1964	1.78244	26.5915	1.78887	27.0833	1.80179	27.5419	1.85141	28.0098	1.90284
									-28.5	19.0191	1.07378	27.8859	2.34355	36.8027	4.04742	44.8644	6.42663	48.8724	9.65775	49.4873	13.7909	40.1066	18.2272	6.48663	1.92939	9.48871	3.98646	12.891	5.9128	17.141	8.08428	12.7091	11.718	15.709	14.623	8.37664	18.6786	25.9702	1.91959	26.3407	1.94261	26.744	1.94877	27.2505	1.96977	27.7148	2.01687	28.199	2.0824
									-27.5	18.6966	1.46333	27.4199	3.10749	36.1999	5.26404	44.1118	8.28986	48.035	12.2071	48.5132	17.2243	39.1375	22.5437	6.40111	2.37409	9.27996	4.93174	12.5908	7.30973	16.7224	10.0383	12.2615	14.3795	15.1335	17.8938	7.82677	22.7419	25.8186	2.25802	26.2173	2.28034	26.6396	2.28612	27.1622	2.3137	27.6301	2.35831	28.1245	2.42592
									-26.5	17.6327	2.30726	25.3636	4.86001	33.0832	7.95085	39.4693	12.311	41.6588	17.6962	40.269	24.2097	28.7344	31.3525	5.25478	3.33075	6.82817	6.99614	9.11053	10.2251	11.9356	14.069	5.70136	19.8514	7.32289	24.33	-1.89392	30.7973	26.5321	2.78567	26.9683	2.82864	27.3841	2.8233	27.9297	2.87397	28.4103	2.92518	28.9069	2.98098
									-25.5	19.3529	1.03692	28.4609	2.50179	37.5935	4.53259	45.8698	7.33291	50.0731	10.847	51.1477	14.8763	42.1071	19.6294	6.91737	1.95157	10.2139	4.20658	13.7454	6.39427	18.1152	8.88887	13.7713	12.6657	17.0774	15.3344	10.0651	19.6662	25.6466	1.98648	26.0972	2.01654	26.5743	2.01112	27.1214	2.02929	27.6461	2.02525	28.1398	2.0201
									-24.5	19.8851	0.27723	29.9047	0.22226	40.2938	0.36875	50.3171	0.94346	56.8137	1.88817	60.5762	3.08436	54.6745	4.67253	8.14793	0.32106	12.8669	0.73025	17.8019	1.24338	23.7382	1.89731	21.9334	3.06569	27.077	3.90528	22.962	5.47384	24.3667	0.64991	24.7813	0.6702	25.2358	0.69871	25.7691	0.73039	26.2664	0.75074	26.732	0.77392
									-23.5	19.7891	0.67531	29.2151	1.46691	38.6107	2.69427	47.1431	4.47644	51.6761	6.80361	53.2113	9.41472	44.549	12.7415	7.25772	1.12374	10.949	2.40592	14.7003	3.77759	19.2574	5.42558	15.2581	7.97243	18.9295	9.76321	12.2592	12.8394	25.5361	1.16991	25.9607	1.19433	26.4518	1.22932	27.0125	1.27825	27.5235	1.31059	27.9935	1.33044
									-22.5	18.8408	1.94432	27.4039	3.82545	35.596	6.48574	42.6624	9.95338	45.4757	14.0628	44.8923	18.9703	33.8253	24.5541	6.18582	2.43155	8.72558	5.08512	11.2921	7.7811	14.6078	10.8242	8.84442	15.1371	11.0217	18.5364	2.18583	23.6016	26.2425	1.92268	26.6763	1.95122	27.1998	1.99618	27.7708	2.05363	28.2978	2.07745	28.7957	2.11797
									-21.5	18.6475	2.03297	27.1281	3.96288	35.2021	6.73332	42.2479	10.2857	44.9385	14.6634	44.4519	19.6668	33.5261	25.5425	6.0358	2.571	8.48139	5.32635	10.966	8.15829	14.3239	11.3048	8.44797	15.9002	10.7387	19.3339	2.06701	24.6859	26.2903	2.06372	26.7054	2.08161	27.2181	2.13623	27.754	2.20604	28.2929	2.22705	28.773	2.25851
									-20.5	19.0097	1.92859	27.9704	3.73343	36.7123	6.34917	44.6008	9.69996	48.2712	13.9254	48.7756	18.8229	38.8246	24.6953	6.73669	2.41317	9.88223	5.02951	13.0431	7.74033	17.1288	10.7371	12.2642	15.1864	15.1318	18.5572	7.34189	23.9538	25.6111	2.03034	26.0621	2.04061	26.597	2.09502	27.1396	2.16375	27.7098	2.17948	28.2199	2.20599
									-19.5	18.1266	3.30176	26.2406	6.20358	33.8601	10.1414	40.448	15.1114	42.4562	20.9071	41.2826	27.7377	29.5368	35.7982	5.65366	3.59628	7.65387	7.46175	9.72704	11.2837	12.7336	15.5609	6.17631	21.4263	7.98904	26.1646	-1.37491	33.3883	26.3881	2.43514	26.8342	2.44904	27.3657	2.50011	27.8935	2.57468	28.469	2.58762	28.9521	2.63468
									-18.5	19.2653	1.33105	28.1935	2.65743	36.8903	4.51222	44.7064	6.88501	48.01	10.2334	48.5165	13.5042	38.3834	17.7455	6.6631	1.84181	9.66624	3.84288	12.7159	5.84495	16.7004	8.00437	11.3903	11.5811	14.3886	13.7461	6.41451	17.744	25.9298	1.67003	26.3886	1.68742	26.9049	1.72586	27.4418	1.76546	28.0155	1.79011	28.4838	1.78919
									-17.5	18.728	2.1541	27.3311	3.68557	35.5436	5.8781	42.8648	8.75495	45.4308	12.631	45.2708	16.8159	34.3382	22.0708	6.28266	2.20471	8.89949	4.59759	11.4857	7.05916	15.0456	9.73689	8.99875	13.9919	11.528	16.8599	2.81559	21.7287	26.0114	2.11927	26.4822	2.12415	27.0443	2.1608	27.6011	2.18725	28.2126	2.20754	28.6887	2.20907
									-16.5	17.4645	4.90362	25.5293	6.73316	33.2693	8.52277	40.0902	10.8491	42.4052	13.8202	41.8613	18.0189	30.4612	23.8304	5.73732	2.49637	7.86681	4.98709	10.1707	7.35974	13.378	10.2386	7.23034	14.6933	9.42493	18.115	0.35969	23.993	25.7126	3.04388	26.1959	3.04749	26.7718	3.07781	27.3498	3.11839	27.9748	3.12999	28.4705	3.14555
									-15.5	17.2794	6.93961	25.5798	9.35453	33.9233	11.2593	41.5707	12.9985	45.1251	14.5627	45.93	17.2763	36.3131	21.8035	6.06579	2.81922	8.64763	5.33997	11.6861	7.1691	15.679	9.43186	10.8925	12.7865	14.0145	15.7859	6.62185	21.0867	25.0953	3.23723	25.5674	3.23504	26.0927	3.24472	26.6442	3.27786	27.2514	3.28753	27.731	3.30416
									-14.5	20.0946	0.23448	29.7749	0.59647	39.4785	1.06487	48.5108	1.54982	53.0541	2.29602	55.0126	3.03518	46.9538	4.04476	7.53594	0.57433	11.5022	1.12069	15.495	1.5921	20.5043	1.97729	16.3543	2.77786	20.3758	3.22558	14.2495	4.21559	25.4028	0.61662	25.8529	0.56615	26.3606	0.52317	26.8836	0.48235	27.5002	0.46969	27.9477	0.45701
									-13.5	19.2593	0.68291	28.59	1.74204	37.9364	3.52576	46.585	5.88631	50.8644	9.2169	52.3867	12.8077	43.5127	17.272	7.21356	1.54311	10.8519	3.3366	14.5822	5.29812	19.2708	7.41498	14.9434	10.9522	18.5732	13.3792	11.6659	17.4055	25.1517	1.84437	25.6403	1.834	26.19	1.8345	26.7544	1.83984	27.3874	1.839	27.8674	1.85187
									-12.5	18.5169	1.28563	27.0659	2.72837	35.3021	5.15547	42.6037	8.28926	45.0981	12.8049	44.6252	17.7319	33.2234	24.0426	6.26509	2.10183	8.85265	4.53896	11.4761	7.2279	15.0131	10.0744	8.87607	14.8539	11.1104	18.2387	1.95233	23.9479	25.8582	2.37806	26.351	2.3791	26.9288	2.39135	27.5034	2.41355	28.154	2.4148	28.6567	2.44478
									-11.5	18.1006	1.61303	26.5529	2.99504	34.7565	5.47189	42.1812	8.73956	44.9337	13.6265	44.7752	19.0937	33.7132	25.9446	6.19749	2.24317	8.76358	4.86106	11.4422	7.7929	15.1555	10.8657	9.35374	16.1559	11.8108	19.9491	2.99088	26.2111	25.6023	2.72272	26.096	2.72631	26.6759	2.74751	27.2293	2.77346	27.8816	2.77767	28.3741	2.81641
									-10.5	18.2794	1.20311	26.8128	2.83945	35.0456	5.54685	42.5713	8.86739	45.4961	13.6253	45.4184	18.9429	34.5182	25.5388	6.2263	2.34996	8.83161	5.00914	11.516	7.95248	15.3002	10.9261	9.6352	15.9243	12.1737	19.5616	3.47219	25.5139	25.7125	2.56615	26.2058	2.55059	26.7727	2.57596	27.3181	2.58101	27.9472	2.56352	28.4315	2.6007
									-9.5	17.5931	1.79516	25.8564	3.43658	33.9009	6.10384	41.3859	9.42126	44.6288	14.0436	44.8013	19.323	34.6579	25.6919	5.76842	2.70363	8.06691	5.60704	10.6725	8.67096	14.4781	11.7026	9.20593	16.7356	11.9359	20.2597	3.98295	26.0782	25.7773	2.98093	26.2371	2.9305	26.7566	2.93222	27.2759	2.90408	27.8439	2.85403	28.3234	2.84852
									-8.5	17.0009	1.85126	24.4227	3.65114	31.3651	6.15899	37.5699	9.09379	39.2291	13.0126	37.708	17.3256	26.0528	22.1583	4.47146	2.7856	5.46898	5.64876	6.89835	8.39786	9.58952	11.0079	2.57889	15.2392	4.3113	18.0284	-5.04921	22.4229	27.0998	2.69845	27.5129	2.63801	27.99	2.61791	28.4743	2.5642	28.9893	2.48229	29.4314	2.45931
									-7.5	17.5117	2.16565	24.9069	4.1613	31.6498	6.80725	37.434	9.77257	38.2432	13.644	35.787	17.8182	23.3342	22.2946	4.48096	2.60784	5.3394	5.34121	6.4682	7.96113	8.75249	10.476	0.83466	14.3963	1.89922	17.1958	-8.18113	21.1959	27.5169	1.94651	27.9344	1.92194	28.4203	1.93021	28.9114	1.90853	29.44	1.87456	29.8983	1.87941
									-6.5	17.7783	2.19385	25.4581	4.2686	32.5328	7.06279	38.6648	10.2754	39.8582	14.5341	37.7599	19.1447	25.7913	24.1142	4.89876	2.72426	6.1806	5.6048	7.63652	8.39192	10.2147	11.1484	2.7118	15.478	3.9457	18.5728	-5.67055	23.0731	27.1548	2.11702	27.5774	2.09901	28.088	2.10067	28.593	2.09057	29.1449	2.06355	29.6258	2.06566
									-5.5	17.6822	2.30346	25.3591	4.44096	32.4273	7.37862	38.6176	10.712	39.9164	15.1015	37.8688	19.9652	26.1543	25.0673	4.8619	2.88773	6.14045	5.87183	7.59744	8.78113	10.238	11.6292	2.85076	16.0956	4.10851	19.3421	-5.27288	23.9524	27.1255	2.23272	27.5476	2.19769	28.0607	2.19225	28.558	2.1751	29.102	2.14428	29.5868	2.13956
									-4.5	18.3114	1.87079	26.6121	3.72263	34.5926	6.36628	41.8919	9.41526	44.6841	13.4366	44.3477	18.0012	34.4915	22.7471	5.68018	2.56582	7.84791	5.25381	10.2475	7.9492	13.8753	10.5918	8.04544	14.7554	10.504	17.8068	2.82743	22.1219	26.5066	2.18022	26.9092	2.15772	27.3889	2.16198	27.8613	2.14695	28.3876	2.11225	28.8482	2.11122
									-3.5	17.5782	1.78732	25.3685	3.65093	32.7904	6.23105	39.4864	9.25701	41.7282	13.1121	40.7805	17.3625	30.0905	22.0671	4.97976	2.7307	6.47299	5.55149	8.34287	8.26464	11.4654	10.9141	5.06143	15.022	7.14206	17.7479	-1.29884	22.0601	26.8724	2.47938	27.2722	2.4441	27.7475	2.42175	28.2171	2.39003	28.7235	2.32507	29.1783	2.2933
									-2.5	17.5706	1.52898	25.2792	3.16497	32.5871	5.46417	39.1234	8.18631	41.1475	11.6897	39.9053	15.633	28.9619	19.8245	4.84545	2.45533	6.18276	4.99878	7.9117	7.45328	10.8859	9.85386	4.23821	13.6196	6.12917	16.159	-2.55772	20.0101	27.0547	2.35297	27.4603	2.309	27.9321	2.27933	28.3992	2.24455	28.8967	2.18097	29.3497	2.15441
									-1.5	18.2629	1.00235	26.3243	2.15181	33.9984	3.81172	40.8731	5.81608	43.1403	8.47275	42.156	11.4681	31.4978	14.7104	5.28083	1.76678	7.01927	3.62107	9.03887	5.4312	12.2756	7.21703	5.84602	10.1029	7.90338	12.0366	-0.534	15.0277	27.0265	1.80827	27.4254	1.77794	27.8939	1.75295	28.3565	1.72724	28.8529	1.68699	29.3082	1.66892
									-0.5	18.1115	1.30549	26.043	2.62647	33.5701	4.45337	40.2835	6.58802	42.4076	9.41396	41.2589	12.5792	30.3652	16.113	5.12473	1.97685	6.70076	4.03287	8.58758	5.99404	11.6945	7.90088	5.12953	10.972	7.08707	13.0295	-1.55042	16.3156	27.1182	1.8583	27.5138	1.83914	27.9783	1.82051	28.438	1.8016	28.9257	1.76717	29.3772	1.75321
									0.5	17.8933	1.65178	25.6561	3.24722	32.9646	5.35173	39.4195	7.6744	41.2235	10.6259	39.6688	13.7928	28.3019	17.1516	4.8888	2.28595	6.2197	4.60264	7.87529	6.73266	10.7445	8.72909	3.82634	11.8372	5.48856	13.8291	-3.61574	16.8724	27.2657	1.89736	27.6718	1.85696	28.1469	1.81675	28.6161	1.77866	29.109	1.7252	29.5724	1.68689
									1.5	18.1485	1.61857	26.0675	3.11771	33.5399	5.06822	40.1642	7.28262	42.071	10.0937	40.7402	13.2149	29.332	16.4914	5.11134	2.16677	6.64717	4.35233	8.45436	6.34312	11.473	8.27464	4.67082	11.2779	6.50193	13.3047	-2.64977	16.2929	27.1682	1.7643	27.5749	1.73486	28.0518	1.70684	28.5163	1.68986	29.0177	1.6596	29.4715	1.64786
									2.5	18.2156	1.72635	26.0817	3.27485	33.3385	5.41164	39.7363	7.71144	41.0932	10.9216	39.1629	14.381	27.3695	17.92	5.06301	2.06517	6.50348	4.20018	8.07441	6.29874	10.8807	8.27179	3.51542	11.56	4.89131	13.8996	-4.60048	17.0859	27.2926	1.53627	27.7057	1.5167	28.2031	1.52105	28.677	1.51348	29.2049	1.52089	29.6771	1.53129
									3.5	18.5073	1.31628	26.741	2.61765	34.5971	4.40492	41.6473	6.49444	44.0043	9.1866	43.2506	12.2246	32.8508	15.3389	5.52758	1.92393	7.49312	3.88967	9.68609	5.77127	13.0638	7.61095	6.71922	10.4992	8.94067	12.4978	0.72723	15.3519	26.8859	1.72123	27.2926	1.69111	27.7651	1.6786	28.2345	1.66118	28.7543	1.62633	29.2042	1.62345
									4.5	18.2669	1.41046	26.3143	2.81531	33.9154	4.73337	40.6833	6.9942	42.6357	9.91368	41.4374	13.265	30.6034	16.6622	5.3284	2.07316	7.06411	4.21114	9.0082	6.24505	12.1398	8.24323	5.37958	11.3816	7.27906	13.6031	-1.32638	16.7286	26.9631	1.87819	27.381	1.85133	27.8724	1.83544	28.3523	1.81698	28.8908	1.77645	29.3493	1.77946
									5.5	17.7475	1.6863	25.3181	3.37998	32.2591	5.69284	38.3133	8.34279	39.1409	11.9287	36.7814	15.7688	24.5039	20.0861	4.78129	2.36428	5.89407	4.83272	7.18927	7.20051	9.70911	9.50736	1.8118	13.2488	2.87151	15.7628	-7.03788	19.6802	27.2938	2.00875	27.7298	1.98837	28.2477	1.9728	28.7363	1.95654	29.3059	1.92865	29.7894	1.91571
									6.5	17.9223	1.5949	25.5164	3.02347	32.4805	4.83372	38.5699	6.81122	39.2954	9.37337	36.7711	12.1334	24.6517	15.0026	4.7271	1.99865	5.79428	4.01371	7.06252	5.80947	9.60171	7.49176	1.55105	10.151	2.50942	11.9244	-7.26771	14.5437	27.5173	1.52261	27.942	1.49245	28.4439	1.45794	28.9152	1.42662	29.4768	1.391	29.9598	1.36943
									7.5	17.6523	1.5431	24.8987	2.74958	31.3856	4.13969	36.8998	5.61704	36.8208	7.34159	33.3854	9.18519	20.3964	11.065	4.27315	1.66304	4.83725	3.28186	5.61622	4.5951	7.65225	5.81394	-1.23754	7.56034	-0.89865	8.70887	-11.4717	10.4059	27.9273	1.0496	28.3543	1.01728	28.8544	0.97727	29.3266	0.94683	29.8894	0.90468	30.3775	0.87723
									8.5	16.7904	1.48986	23.2657	2.65434	28.7909	3.98729	33.2443	5.4719	31.7289	7.37836	26.711	9.42541	12.1868	11.6837	3.3616	1.45262	2.93058	2.94643	2.80092	4.17154	3.94736	5.40091	-6.36446	7.26334	-7.11585	8.63565	-19.0639	10.6402	28.4812	0.78885	28.9165	0.78844	29.4195	0.76851	29.8926	0.76409	30.4619	0.75716	30.9599	0.75543
									9.5	16.6645	1.45227	23.0094	2.62014	28.2655	3.98857	32.5	5.58603	30.5683	7.55098	25.1156	9.59797	10.1293	11.7065	3.23646	1.40508	2.64447	2.88737	2.25253	4.14406	3.2173	5.48019	-7.50292	7.39346	-8.57581	8.7688	-20.9414	10.6443	28.5509	0.75819	28.9936	0.76434	29.5194	0.75262	29.9934	0.76302	30.5787	0.75888	31.0866	0.75882
									10.5	16.603	1.44873	22.9231	2.59979	28.1599	4.01435	32.4655	5.63087	30.6216	7.83528	25.3616	10.1887	10.4499	12.8217	3.1674	1.35589	2.53557	2.79751	2.13108	4.09205	3.17265	5.44691	-7.45492	7.58274	-8.34869	9.23395	-20.6383	11.5871	28.5961	0.68846	29.0302	0.69798	29.547	0.70228	30.0045	0.72054	30.5753	0.74522	31.066	0.76816
									11.5	15.8334	2.32305	21.5709	4.14213	26.0697	6.46673	29.493	9.04534	26.5147	12.6228	20.3106	16.3321	4.02375	20.5384	2.50075	2.09646	1.15952	4.34686	0.09735	6.48506	0.40064	8.6445	-11.2993	12.1139	-12.8077	14.7293	-26.3057	18.4989	28.8839	1.00792	29.3242	1.03063	29.8463	1.07115	30.3216	1.10534	30.9056	1.16407	31.3885	1.20508
									12.5	14.7322	3.15939	19.557	5.61954	22.9189	8.8246	25.0813	12.3412	20.3329	17.1538	12.4068	22.1007	-5.80274	27.5353	1.56836	2.8214	-0.85817	5.85663	-2.93725	8.78796	-3.67708	11.7221	-17.0496	16.3604	-19.7658	19.8367	-34.9572	24.6801	29.2654	1.31946	29.735	1.35552	30.2766	1.41311	30.7706	1.45775	31.3863	1.52931	31.8838	1.57915
									13.5	14.7584	4.13693	19.6615	7.36157	23.1954	11.446	25.5597	16.0824	21.283	22.0166	14.0096	28.2653	-3.80779	35.2369	1.6721	3.62618	-0.62502	7.55615	-2.5172	11.2462	-3.05998	15.0988	-15.947	20.7752	-18.1505	25.1549	-32.9736	31.3149	29.1418	1.63307	29.6049	1.67813	30.1364	1.73227	30.6179	1.79547	31.2134	1.86321	31.6852	1.91805
									14.5	14.5277	5.80161	19.4066	10.2536	22.8655	15.81	25.1475	22.1064	21.0733	29.7782	13.8804	37.968	-3.79408	46.7259	1.65493	5.0033	-0.60209	10.3992	-2.50948	15.3792	-3.08651	20.5857	-15.7104	27.9005	-17.8805	33.605	-32.5437	41.3401	28.9715	2.20038	29.4214	2.25275	29.9647	2.30697	30.4489	2.38379	31.0345	2.44363	31.5088	2.49875
									15.5	14.6191	6.37458	19.5635	11.3061	23.0845	17.3579	25.4601	24.2506	21.5102	32.4542	14.5658	41.2495	-2.99118	50.59	1.80427	5.41819	-0.33329	11.3397	-2.16821	16.7422	-2.64971	22.4349	-15.1268	30.2444	-17.1185	36.3697	-31.6683	44.6096	28.8388	2.35299	29.2949	2.41279	29.848	2.47044	30.3291	2.55948	30.9204	2.6184	31.3896	2.6727
									16.5	13.5031	6.99998	17.5694	12.2922	19.9584	18.8813	20.9647	26.3599	15.7253	34.9533	7.12737	44.348	-12.0244	53.9569	0.77056	5.81469	-2.45757	12.1217	-5.32175	17.9395	-6.95796	24.0736	-20.6972	32.1726	-23.8266	38.7482	-39.806	47.169	29.3502	2.28632	29.8088	2.35908	30.37	2.42857	30.8777	2.52208	31.4559	2.57433	31.9325	2.64764
									17.5	16.1681	5.32653	22.3274	9.1703	27.1451	14.2594	30.8818	19.8779	28.6952	26.1332	23.675	32.9841	7.81898	39.7119	3.05288	4.46126	2.3249	9.10871	1.60774	13.6161	2.18652	18.2139	-8.67806	24.144	-9.308	28.888	-22.4196	34.8168	28.3905	1.83474	28.8249	1.85227	29.3832	1.90964	29.8815	1.9635	30.4679	1.98578	30.9191	2.01966
									18.5	17.4542	3.27164	24.6614	5.89534	31.0425	9.29605	36.5234	13.0394	36.6035	17.6216	33.865	22.3947	20.7185	27.2425	4.33646	3.11265	4.95369	6.43539	5.69341	9.57229	7.73298	12.6874	-0.90701	17.1856	0.02134	20.3967	-10.6785	24.7278	27.6715	1.76692	28.1028	1.77245	28.6298	1.77994	29.1099	1.78468	29.6654	1.78898	30.1081	1.78227
									19.5	18.1137	1.86825	25.9169	3.56052	33.1033	5.76901	39.4243	8.23824	40.6319	11.5545	38.9862	14.7766	26.6106	18.7167	5.02644	2.2259	6.40255	4.55033	7.89014	6.70312	10.6333	8.82139	3.11051	12.2124	4.76474	14.2955	-5.26215	17.8602	27.2581	1.67189	27.685	1.64868	28.2071	1.61817	28.6843	1.61078	29.2298	1.60076	29.6743	1.57682
									20.5	17.8746	1.55216	25.7447	3.10647	33.1267	5.35084	39.734	7.92122	41.4367	11.4776	40.3075	15.0383	28.3907	19.6229	5.11309	2.34236	6.65009	4.75736	8.38876	7.11343	11.4163	9.4006	4.44681	13.216	6.42088	15.4512	-3.18785	19.6175	26.9349	2.20988	27.3646	2.16543	27.8868	2.12366	28.3572	2.11005	28.9015	2.08492	29.3544	2.03881
									21.5	17.3609	1.99788	24.7853	3.74621	31.5463	6.20873	37.4717	9.09013	38.4219	13.0406	36.6326	16.926	23.4184	22.2624	4.59482	2.54575	5.56046	5.21389	6.71878	7.82435	9.16716	10.4018	1.46426	14.6582	3.03444	17.1447	-7.73726	21.9945	27.23	2.33961	27.669	2.30481	28.2011	2.28462	28.6816	2.28107	29.2165	2.27029	29.6574	2.2264
									22.5	17.5772	2.82154	25.1059	5.09417	31.9666	8.0486	37.9595	11.3733	39.0344	15.5879	37.1193	19.7386	24.0467	25.2593	4.75438	3.042	5.84029	6.16381	7.07351	9.07063	9.56042	11.9398	1.96732	16.3178	3.40431	19.0232	-7.25215	23.972	27.1881	2.21075	27.6386	2.1762	28.1771	2.15791	28.6662	2.1554	29.1991	2.14314	29.6551	2.11673
									23.5	17.3998	3.91927	24.9393	6.71431	31.7936	10.4668	37.751	14.6975	38.8787	20.0303	36.9979	25.3308	23.9856	31.7504	4.86442	3.85374	6.03609	7.67341	7.31541	11.3204	9.77502	14.9541	2.31702	20.4455	3.72787	23.9874	-6.87163	29.7765	26.884	2.5769	27.3656	2.53704	27.9286	2.53644	28.445	2.54283	28.9875	2.55072	29.4558	2.54218
									24.5	16.9388	4.24581	24.5082	7.45053	31.495	11.8585	37.6713	16.7619	39.2372	23.0499	37.856	29.1993	25.8316	36.2135	4.90445	4.39135	6.2324	8.7964	7.74449	13.1161	10.4151	17.3362	3.50893	23.8197	5.2013	27.8658	-4.50602	34.2025	26.4394	3.08448	26.9217	3.03264	27.492	3.03398	28.0286	3.02829	28.5714	3.03633	29.0568	3.0111
									25.5	15.2358	5.20167	22.089	8.90649	28.3823	14.0916	34.0014	20.007	35.1511	27.7542	33.6672	35.3285	21.399	44.1087	4.14297	5.1246	4.82607	10.3699	5.91342	15.6457	8.22234	20.8793	1.13591	29.0377	2.74257	34.0895	-7.14492	42.1133	26.0738	4.0125	26.554	3.97167	27.1399	3.988	27.6884	3.98929	28.2435	4.00341	28.7285	3.97354
									26.5	13.1583	7.49086	19.6631	11.5897	26.2065	16.848	32.5248	22.8777	35.2091	30.7015	35.6203	38.5152	25.7059	48.3511	4.06195	5.60642	4.90965	11.3251	6.70722	16.9538	9.82327	22.6431	4.75905	31.4413	7.53367	36.9466	-0.16402	46.2426	24.4369	4.8379	24.9208	4.81999	25.5126	4.84927	26.0742	4.85901	26.6249	4.87519	27.1293	4.84621
									27.5	8.68822	11.5193	13.333	16.274	18.3603	20.9988	23.5503	25.9014	25.5825	32.0158	25.7058	38.635	16.1007	47.4258	2.16944	6.00207	1.38009	11.819	2.37539	16.9408	4.83815	22.2828	-0.2387	30.6087	2.29535	36.0595	-4.92492	45.4894	23.3279	5.96424	23.8314	5.96169	24.4361	6.00273	25.0182	6.02395	25.5841	6.05512	26.0728	6.05056
									28.5	11.0317	10.7445	15.9118	16.1034	20.236	22.5737	24.1011	29.7114	23.5512	38.7533	20.9218	47.6623	7.81364	58.3267	2.16624	6.92353	0.98382	13.8868	0.75835	20.5285	1.77619	27.3425	-6.41608	37.4823	-5.70266	43.9658	-16.2239	54.2544	25.3073	5.58626	25.8279	5.5756	26.4603	5.62748	27.0868	5.64039	27.6812	5.68977	28.193	5.6671
									29.5	9.52951	23.6259	13.7405	33.5686	17.5323	42.7624	21.1363	49.5919	20.4351	56.2437	17.7302	60.6827	4.00511	66.5849	1.34072	11.5815	-0.54677	21.6494	-1.10827	28.2596	-0.26028	33.7055	-8.47562	39.7045	-7.83608	44.0098	-18.8565	50.7306	25.2008	6.02155	25.725	5.99763	26.3384	6.03039	26.9698	6.01014	27.544	6.04189	28.0679	5.99819
									30.5	11.7812	21.1606	16.6255	30.9088	20.6671	40.7553	24.0061	49.1501	22.7919	58.0811	19.1914	65.4279	3.8301	74.7143	2.11672	11.45	0.68971	21.9312	0.01211	29.7518	0.47108	36.7055	-8.60291	45.1627	-8.52818	51.0706	-21.0944	60.2497	26.0084	5.29517	26.5365	5.29342	27.1751	5.34169	27.8208	5.34188	28.4097	5.37265	28.9275	5.33992
									31.5	13.4752	10.4511	18.9537	17.2522	23.4109	26.062	26.9473	35.7353	25.9052	47.2212	22.2202	58.2064	6.54648	72.5418	2.99368	7.9424	2.20862	16.4072	1.75038	24.6255	2.28034	32.8797	-6.77997	44.3597	-6.73275	51.9361	-19.6093	64.7794	26.2043	4.67983	26.7504	4.70978	27.4027	4.79605	28.0624	4.82207	28.6529	4.86354	29.1564	4.86245
									32.5	15.5733	7.81788	22.3968	13.0248	28.4765	19.8957	33.5455	27.5989	34.2147	36.9392	32.2576	45.7334	18.2219	57.5876	4.54929	6.06386	5.29757	12.6636	6.16866	19.2176	7.86002	25.8864	0.32964	35.3225	1.56657	41.3988	-9.93525	52.0346	25.7875	3.93326	26.3531	3.96568	27.0175	4.04128	27.6997	4.06907	28.287	4.11023	28.7857	4.10273
									33.5	17.9537	4.153	27.0997	5.317	36.4235	6.25808	45.1723	7.30896	50.1805	9.49295	52.6085	12.4326	44.393	16.7049	7.13618	1.62357	10.8226	3.19059	14.7048	4.82864	19.4345	6.97877	16.1724	10.7277	20.354	13.2613	13.9296	17.744	24.1602	2.56467	24.7052	2.56679	25.3444	2.60687	26.0239	2.63336	26.5972	2.657	27.0913	2.64112
									34.5	14.2116	12.4222	22.122	16.9451	30.9735	20.112	39.8818	21.591	45.6909	22.2962	49.4487	22.4646	43.2263	22.3016	5.80472	5.1542	8.56116	9.25757	12.5071	11.0738	17.5998	12.2896	15.5855	13.2816	20.6838	14.6323	16.0906	17.0439	22.8767	3.86455	23.4135	3.85222	24.0563	3.8301	24.7445	3.81731	25.3231	3.79346	25.7934	3.73134
									35.5	12.9706	16.2293	20.1992	22.347	28.4304	26.4765	36.6391	28.792	41.9268	29.5107	44.9884	29.9513	38.3153	28.3405	5.03368	6.98283	7.06613	12.5708	10.5477	14.8346	15.1069	16.3788	12.6929	16.8486	17.3234	18.3029	12.377	19.4928	22.9139	4.40655	23.4406	4.39155	24.0773	4.35726	24.7745	4.35645	25.3406	4.32276	25.8007	4.28612
									36.5	12.4276	19.5748	19.5345	27.3328	27.5111	33.2495	35.651	37.1745	40.7584	39.0698	43.7565	40.1372	37.1548	39.2263	4.85743	8.9444	6.79238	16.2671	10.109	19.7	14.6764	22.1917	12.138	22.9147	16.7143	24.4697	11.9099	24.9448	22.7038	4.48567	23.2442	4.46384	23.9054	4.47038	24.5878	4.47126	25.1908	4.46518	25.6493	4.43763
									37.5	15.1681	9.57091	23.5032	12.996	32.4695	15.3095	41.3918	16.7371	46.9559	17.7998	50.4447	18.814	43.5977	21.4499	6.25996	3.94356	9.38985	7.17369	13.3351	8.92253	18.3849	10.6319	16.0052	13.3052	20.9341	15.3642	15.7656	19.909	23.0434	3.51661	23.6016	3.51036	24.2602	3.54063	24.9542	3.5534	25.5671	3.56645	26.0322	3.52543
									38.5	16.106	5.08355	24.8424	7.1037	34.0733	9.25531	43.2421	11.966	48.7469	16.1342	52.2309	20.147	45.1166	26.9766	6.72111	2.75	10.2281	5.57657	14.3439	8.52467	19.5331	11.7681	17.0243	17.2105	21.9818	20.2391	16.5936	26.89	23.186	3.13646	23.7545	3.13993	24.398	3.19012	25.1002	3.20452	25.7203	3.25497	26.1726	3.2275
									39.5	12.8272	11.335	20.9132	15.8776	30.3274	19.0024	40.367	21.2699	47.6566	22.5274	52.9486	23.0445	48.8689	24.5797	5.97289	5.01506	9.22684	9.29392	14.0102	11.3356	20.1998	13.1541	19.9177	14.7894	26.0559	16.0054	23.4081	19.0426	21.4739	3.30873	22.0714	3.30822	22.7289	3.3157	23.4151	3.3128	24.0381	3.3293	24.4726	3.28864
									40.5	14.4132	4.41774	23.4642	5.79121	33.8269	6.51098	44.8703	6.9195	53.0567	7.5709	58.9572	8.54885	55.788	11.2188	7.0169	1.62407	11.3088	3.00188	16.8363	3.89353	23.7516	5.01357	24.2147	7.31757	30.7418	8.60596	28.7819	12.1823	21.3441	2.13046	21.952	2.12506	22.6135	2.15539	23.3201	2.15647	23.9465	2.19432	24.3863	2.19334
									41.5	13.4127	5.53755	21.7015	7.37777	30.9362	8.91333	40.8958	10.8218	47.7385	13.9296	52.464	17.0892	47.5994	23.2164	6.1106	2.48785	9.45398	4.97129	13.9977	7.46146	20.0008	10.2774	19.1474	15.2408	24.8908	17.7966	21.471	24.0787	21.7739	3.34359	22.3868	3.3312	23.0446	3.38707	23.7705	3.38273	24.4145	3.41918	24.858	3.40448
									42.5	12.9859	4.71751	21.2906	5.74761	30.6536	6.20055	41.0564	6.43125	48.3925	8.17473	53.8016	10.3235	50.006	15.6013	6.16713	1.43603	9.66967	2.76375	14.4761	4.37945	20.9199	6.39658	20.7482	10.6699	27.002	12.5927	24.5551	18.2663	21.3349	3.06439	21.9396	3.05383	22.5833	3.12816	23.2956	3.11198	23.9148	3.16941	24.3253	3.14041
									43.5	9.84685	8.09835	16.7579	10.427	24.8361	11.3242	34.4764	11.4973	41.242	11.6145	46.4214	12.7045	42.7514	17.5716	4.65538	2.70577	6.85686	4.82717	10.892	6.00431	16.9231	7.65829	16.6359	11.6107	22.7872	13.7051	20.6097	20.2411	20.8128	3.99172	21.4012	3.97989	22.0331	4.05744	22.7247	4.02105	23.3226	4.06905	23.6906	4.00985
									44.5	13.1386	5.82021	21.3342	7.4655	30.6148	8.41352	40.7991	9.20948	47.8942	10.9892	52.9522	13.156	48.4283	18.7085	6.07493	2.12085	9.41735	3.99988	14.0429	5.87581	20.289	7.90165	19.7736	12.2014	25.8203	14.2433	22.5941	20.4114	21.593	3.2976	22.1812	3.28289	22.8522	3.34775	23.5556	3.3131	24.1847	3.34782	24.5872	3.31933
									45.5	13.8951	4.79905	22.4238	5.85004	31.9993	6.09525	42.4684	6.24509	49.7843	7.8834	55.0092	9.9961	50.9467	15.5277	6.43586	1.48856	10.0941	2.78406	14.9459	4.38291	21.369	6.28348	21.0344	10.4384	27.2355	12.2079	24.3362	17.9708	21.7236	3.03454	22.3102	3.01375	22.9498	3.05511	23.6612	3.00981	24.2627	3.03075	24.6485	3.00126
									46.5	12.7455	5.64063	21.0993	7.35104	30.8338	8.3132	42.0421	7.86872	50.3159	7.22891	56.0854	6.69757	54.1907	6.47652	6.40294	1.80795	10.1898	3.05979	15.5568	3.34262	22.6821	3.30394	23.7453	3.98753	30.3063	4.72523	29.4001	8.04182	20.8011	2.40713	21.3761	2.41787	21.9544	2.43002	22.6889	2.40488	23.219	2.41034	23.5602	2.46199
									47.5	11.5003	6.43345	19.2415	8.25932	28.5167	9.06683	39.296	8.25221	47.2453	7.06052	52.6703	6.23682	50.8242	6.20064	5.77646	1.89161	8.98261	3.09549	14.0291	3.11719	20.8684	2.97089	21.7454	4.2895	28.1695	5.10108	27.2488	9.73908	20.6316	2.93047	21.2013	2.95098	21.802	2.96987	22.5373	2.95807	23.0705	2.96286	23.3561	2.97995
									48.5	9.74228	5.95168	16.9672	7.59091	26.0746	8.18212	37.0835	7.25011	45.4014	5.63736	51.0471	4.62822	50.7022	2.47796	5.25826	1.66157	8.15001	2.60133	13.3068	2.218	20.469	1.40012	22.0133	2.4962	28.6086	2.9909	29.0275	7.66347	19.878	2.7128	20.4413	2.73398	21.05	2.75068	21.7834	2.73449	22.3171	2.75265	22.5598	2.74976
									49.5	4.90852	0.72141	10.5019	1.06128	18.8483	1.2454	30.0376	1.40833	39.1608	1.4683	45.0531	1.5754	48.052	1.21386	3.65121	0.31398	5.40733	0.60099	10.5864	0.69184	18.2506	0.76959	21.3471	0.7318	27.9632	0.82006	31.382	0.55943	18.0617	0.16696	18.5988	0.17483	19.2132	0.16803	19.9456	0.17329	20.4785	0.17255	20.7087	0.17381
									50.5	2.91745	0.93733	7.61278	1.2903	15.3681	1.67053	26.2552	1.73412	35.2982	1.76276	40.9588	1.78841	44.326	1.80565	2.77717	0.41646	3.7574	0.74607	8.63309	0.9506	16.1606	0.97383	19.3901	0.91512	25.8009	0.96564	29.6101	0.89083	17.6114	0.20497	18.1347	0.19952	18.757	0.21034	19.494	0.19777	20.039	0.19061	20.272	0.18062
[truncated: 2 more columns]
